# Supplementary material for: Hydrolysis of amide bonds in dipeptides and nylon 6 over a ZrO2 catalyst
Source: Royal Society of Chemistry journal article supplement (doi:10.1039/d4cy00533c), 2024-01-01
Supplement: d4cy00533c1.pdf [file d4cy00533c1.pdf]

## Electronic Supplementary Information

### Hydrolysis of amide bonds in dipeptides and nylon 6 over a ZrO<sub>2</sub> catalyst

Satoshi Tomita,<sup>a</sup> Mizuho Yabushita,<sup>a,\*</sup> Yoshinao Nakagawa,<sup>a</sup> Keiichi Tomishige<sup>a,b,\*</sup>

<sup>a</sup>*Department of Applied Chemistry, School of Engineering, Tohoku University, 6-6-07 Aoba, Aramaki, Aoba-ku, Sendai, Miyagi 980-8579, Japan*

<sup>b</sup>*Advanced Institute for Materials Research (WPI-AIMR), Tohoku University, 2-1-1 Katahira, Aoba-ku, Sendai, Miyagi 980-8577, Japan*

*\*Corresponding authors: m.yabushita@tohoku.ac.jp (M.Y.); tomishige@tohoku.ac.jp (K.T.)*

**Table S1.** Previous reports on catalytic hydrolysis of various peptides.<sup>a</sup>

| Entry | Substrate (amount)               | Catalyst (amount)                                                                                           | Solvent                                                   | Temp. [K] | Time [h] | Conv. [%]         | Yield [%]         | TOF <sup>b</sup> [h <sup>-1</sup> ] | Ref. |
|-------|----------------------------------|-------------------------------------------------------------------------------------------------------------|-----------------------------------------------------------|-----------|----------|-------------------|-------------------|-------------------------------------|------|
| 1     | Cbz-Gly-Ser-OMe (150 mM)         | Sc(OTf) <sub>3</sub> (75 mM)                                                                                | H <sub>2</sub> O/EtOH (vol/vol = 1/1)                     | 373       | 18       | n.r.              | 86 <sup>f</sup>   | 0.096 <sup>i</sup>                  | S1   |
| 2     | Gly-Gly (2.0 mM)                 | K <sub>15</sub> H[Zr(α <sub>2</sub> -P <sub>2</sub> W <sub>17</sub> O <sub>61</sub> ) <sub>2</sub> ] (2 mM) | D <sub>2</sub> O (pD = 5.0 by using DCl)                  | 333       | 900      | 99                | 98 <sup>g</sup>   | 0.0050                              | S2   |
| 3     | Gly-Phe (10 mM)                  | Ce(NH <sub>4</sub> ) <sub>2</sub> (NO <sub>3</sub> ) <sub>6</sub> (10 mM)                                   | TRIS buffer (pH 7.0; 0.1 M)                               | 353       | 24       | 93                | 88                | 0.35 (323 K)                        | S3   |
| 4     | Gly-Gly (2 μmol)                 | MOF-808 <sup>c</sup><br>(2.0 μmol based on Zr <sub>6</sub> cluster)                                         | D <sub>2</sub> O<br>(1 mL; pD = 7.4 by using NaOD)        | 333       | 4.5      | 99                | 99 <sup>g</sup>   | 0.14                                | S4   |
| 5     | Hen egg-white lysozyme (0.02 mM) | MOF-808 <sup>c</sup><br>(2.0 μmol based on Zr <sub>6</sub> cluster)                                         | Phosphate buffer (pH 7.4)                                 | 333       | 1–25     | n.r. <sup>e</sup> | n.r. <sup>e</sup> | –                                   | S4   |
| 6     | Gly-Gly (2 μmol)                 | MIP-201 <sup>c</sup><br>(2.0 μmol based on Zr <sub>6</sub> cluster)                                         | D <sub>2</sub> O<br>(1 mL; pD = 7.4 by using NaOD)        | 333       | 25       | 81                | 80 <sup>g</sup>   | 0.0083                              | S5   |
| 7     | Myoglobin (0.02 mM)              | MIP-201 <sup>c</sup><br>(2.0 μmol based on Zr <sub>6</sub> cluster)                                         | HEPES buffer (pH 7.4)<br>or H <sub>2</sub> O (pH 7.4)     | 333       | 1–96     | n.r. <sup>e</sup> | n.r. <sup>e</sup> | –                                   | S5   |
| 8     | Gly-Gly (2 μmol)                 | NU-1000 <sup>c</sup><br>(2.0 μmol based on Zr <sub>6</sub> cluster)                                         | D <sub>2</sub> O<br>(1 mL; pD = 7.4 by using NaOD)        | 333       | 220      | 75                | 46 <sup>g</sup>   | 0.0017                              | S6   |
| 9     | Hen egg-white lysozyme (0.02 mM) | NU-1000 <sup>c</sup><br>(2.0 μmol based on Zr <sub>6</sub> cluster)                                         | H <sub>2</sub> O (1 mL)                                   | 333       | 5–72     | n.r. <sup>e</sup> | n.r. <sup>e</sup> | –                                   | S6   |
| 10    | Gly-Gly (2 μmol)                 | UiO-66 <sup>c</sup><br>(2.0 μmol based on Zr <sub>6</sub> cluster)                                          | D <sub>2</sub> O<br>(1 mL; pD = 7.8 by using NaOD)        | 333       | 360      | 66                | 65 <sup>g</sup>   | 0.0004                              | S7   |
| 11    | Hen egg-white lysozyme (0.02 mM) | UiO-66 <sup>c</sup><br>(2.0 μmol based on Zr <sub>6</sub> cluster)                                          | Phosphate buffer (pH 7.4)<br>or H <sub>2</sub> O (pH 7.4) | 333       | 0–50     | n.r. <sup>e</sup> | n.r. <sup>e</sup> | –                                   | S7   |
| 12    | Bovine serum albumin (50 pmol)   | SP-550C <sup>d</sup><br>(10 μL of resin slurry)                                                             | H <sub>2</sub> O (5 μL)                                   | 383       | 20       | n.r. <sup>e</sup> | 36 <sup>h</sup>   | –                                   | S8   |

|    |                     |                                          |                          |     |    |     |                      |                            |           |
|----|---------------------|------------------------------------------|--------------------------|-----|----|-----|----------------------|----------------------------|-----------|
| 13 | Gly-Gly (2.0 mmol)  | m-ZrO <sub>2</sub> (0.10 g (0.81 mmol))  | H <sub>2</sub> O (5.0 g) | 373 | 24 | 100 | 97 <sup>s</sup>      | 1.2                        | This work |
| 14 | Gly-Leu (0.50 mmol) | m-ZrO <sub>2</sub> (0.025 g (0.20 mmol)) | H <sub>2</sub> O (5.0 g) | 373 | 24 | 100 | 95 (Gly)<br>95 (Leu) | 0.59 (Gly)<br>0.59 (Leu)   | This work |
| 15 | Gly-Asp (0.50 mmol) | m-ZrO <sub>2</sub> (0.025 g (0.20 mmol)) | H <sub>2</sub> O (5.0 g) | 373 | 72 | 100 | 82 (Gly)<br>84 (Asp) | 0.089 (Gly)<br>0.079 (Asp) | This work |
| 16 | His-Leu (0.50 mmol) | m-ZrO <sub>2</sub> (0.025 g (0.20 mmol)) | H <sub>2</sub> O (5.0 g) | 373 | 24 | 100 | 73 (His)<br>76 (Leu) | 0.44 (His)<br>0.48 (Leu)   | This work |

<sup>a</sup>Abbreviations: Cbz = benzyloxycarbonyl; Gly = glycine; Ser = L-serine; OTf = trifluoromethanesulfonate; Phe = L-phenylalanine; Leu = L-leucine; Asp = L-aspartic acid; His = L-histidine; m-ZrO<sub>2</sub> = monoclinic-rich ZrO<sub>2</sub>; TRIS = tris(hydroxymethyl)aminomethane hydrochloride; HEPES = 2-[4-(2-hydroxyethyl)-1-piperazinyl]ethanesulfonic acid; n.r. = not reported. <sup>b</sup>Turnover frequency calculated from the initial formation rate of target product (in the case of Gly-Gly, the halved value was used due to the production of two glycine molecules) and mole of metal atoms in each catalyst: TOF [h<sup>-1</sup>] = (Formation rate of target product [mmol h<sup>-1</sup>]) / (Mole of metal atoms in each catalyst [mmol]). <sup>c</sup>Metal-organic framework (MOF) consisting of Zr<sub>6</sub> cluster. <sup>d</sup>Cation-exchange resin in H<sup>+</sup>-form. <sup>e</sup>Only the data of sodium dodecyl sulfate-polyacrylamide gel electrophoresis (SDS-Page) were reported. <sup>f</sup>Total yield of Cbz-Gly-OH and Cbz-Gly-OEt. <sup>g</sup>Carbon-based yield (unit: %-C). <sup>h</sup>Total yield of amino acids. <sup>i</sup>Calculated from the reaction result shown in this table due to a lack of time course data.

**Table S2.** Previous reports on catalytic hydrolysis/alcoholysis of aliphatic and aromatic amides.<sup>a</sup>

| Entry | Substrate<br>(amount [mmol])                                                             | Reaction<br>type | Catalyst<br>(amount)                                                           | Solvent <sup>b</sup><br>(amount)                        | Additive<br>(amount)               | Temp.<br>[K] | Time<br>[h] | Conv.<br>[%] | Yield [%]                     |                                | TOF <sup>c</sup><br>[h <sup>-1</sup> ] | Ref. |
|-------|------------------------------------------------------------------------------------------|------------------|--------------------------------------------------------------------------------|---------------------------------------------------------|------------------------------------|--------------|-------------|--------------|-------------------------------|--------------------------------|----------------------------------------|------|
|       |                                                                                          |                  |                                                                                |                                                         |                                    |              |             |              | Carboxylic acid<br>(or ester) | Amine<br>(or NH <sub>3</sub> ) |                                        |      |
| 1     | 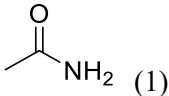 (1)    | Hydrolysis       | Nb <sub>2</sub> O <sub>5</sub><br>(50 mg<br>(0.19 mmol))                       | H <sub>2</sub> O<br>(5 mmol)                            | –                                  | Reflux       | 20          | 100          | 97                            | n.r.                           | 0.21                                   | S9   |
| 2     |  (1)    | Alcoholysis      | CeO <sub>2</sub><br>(80 mg<br>(0.46 mmol))                                     | Benzyl alcohol<br>(1 mmol)<br>+ mesitylene<br>(1.5 g)   | –                                  | 438          | 22          | n.r.         | 95 (ester)                    | n.r.                           | 7.1                                    | S10  |
| 3     |  (1)    | Alcoholysis      | CeO <sub>2</sub><br>(80 mg<br>(0.46 mmol))                                     | <i>n</i> -C <sub>8</sub> H <sub>17</sub> OH<br>(2 mmol) | HY zeolite <sup>e</sup><br>(0.1 g) | 448          | 36          | n.r.         | 97 (ester)                    | n.r.                           | 0.20                                   | S11  |
| 4     |  (1)    | Alcoholysis      | CeO <sub>2</sub><br>(80 mg<br>(0.46 mmol))                                     | Phenol<br>(1.25 mmol)                                   | –                                  | 453          | 36          | 100          | 97 (ester)                    | n.r.                           | 0.12                                   | S12  |
| 5     |  (0.3) | Alcoholysis      | MOF-808-P <sup>d</sup><br>(0.0125 mmol<br>based on Zr <sub>6</sub><br>cluster) | <i>n</i> -C <sub>4</sub> H <sub>9</sub> OH<br>(0.6 mL)  | –                                  | 423          | 24          | 100          | 99 (ester)                    | n.r.                           | 0.50                                   | S13  |
| 6     |  (1)  | Alcoholysis      | Zn(OTf) <sub>2</sub><br>(0.05 mmol)                                            | <i>n</i> -C <sub>4</sub> H <sub>9</sub> OH<br>(2 mL)    | Dimethyl<br>carbonate<br>(2 mmol)  | Reflux       | 45          | n.r.         | 85 (ester)                    | n.r.                           | 0.38 <sup>f</sup>                      | S14  |

|    |  |             |                                                                   |                                                         |                                      |        |     |      |             |      |                  |              |
|----|--|-------------|-------------------------------------------------------------------|---------------------------------------------------------|--------------------------------------|--------|-----|------|-------------|------|------------------|--------------|
| 7  |  | Alcoholysis | [Mn(acac)(OEt)<br>(EtOH)] <sub>4</sub><br>(0.0025 mmol)           | <i>n</i> -C <sub>4</sub> H <sub>9</sub> OH<br>(0.25 mL) | Me <sub>2</sub> N-phen<br>(0.01 mol) | Reflux | 18  | n.r. | >99 (ester) | n.r. | 2.8 <sup>f</sup> | S15          |
| 8  |  | Alcoholysis | Mn(acac) <sub>2</sub> (Me <sub>2</sub><br>N-phen)<br>(0.025 mmol) | <i>n</i> -C <sub>4</sub> H <sub>9</sub> OH<br>(0.25 mL) | KOMe<br>(0.025<br>mmol)              | Reflux | 12  | n.r. | 96 (ester)  | n.r. | 8.6              | S16          |
| 9  |  | Hydrolysis  | m-ZrO <sub>2</sub><br>(0.10 g<br>(0.81 mmol))                     | H <sub>2</sub> O (10 g)                                 | –                                    | 463    | 120 | 79   | 78          | 76   | 0.087            | This<br>work |
| 10 |  | Hydrolysis  | m-ZrO <sub>2</sub><br>(0.10 g<br>(0.81 mmol))                     | H <sub>2</sub> O (10 g)                                 | –                                    | 463    | 168 | 52   | 48          | 50   | 0.0070           | This<br>work |

<sup>a</sup>Abbreviations: OTf = trifluoromethanesulfonate; acac = acetylacetonate; OEt = ethoxy; EtOH = ethanol; Me<sub>2</sub>N-phen = 4,7-bis(dimethylamino)-1,10-phenanthroline; m-ZrO<sub>2</sub> = monoclinic-rich ZrO<sub>2</sub>; OMe = methoxy; n.r. = not reported. <sup>b</sup>In the cases of alcohols and phenol, they behaved as both a reaction solvent and reactant. <sup>c</sup>Turnover frequency calculated from the initial formation rate of carboxylic acid (or ester) and mole of metal atoms in each catalyst: TOF [h<sup>-1</sup>] = (Formation rate of carboxylic acid (or ester) [mmol h<sup>-1</sup>]) / (Mole of metal atoms in each catalyst [mmol]). <sup>d</sup>Metal-organic framework (MOF) consisting of Zr<sub>6</sub> cluster. <sup>e</sup>Placed at the upper side of the reaction vessel. <sup>f</sup>Calculated from each reaction result shown in this table due to a lack of time course data.

**Table S3.** Exemplified previous reports on hydrolysis of nylon 6.<sup>a</sup>

| Entry | Substrate<br>(amount [g])  | Catalyst (amount [g])                                                        | Solvent                                                       | Temp.<br>[K] | Time<br>[h] | Conv.<br>[%] | Yield [%]               |                               | Ref.         |
|-------|----------------------------|------------------------------------------------------------------------------|---------------------------------------------------------------|--------------|-------------|--------------|-------------------------|-------------------------------|--------------|
|       |                            |                                                                              |                                                               |              |             |              | $\epsilon$ -Caprolactam | $\epsilon$ -Aminocaproic acid |              |
| 1     | Nylon 6 carpet<br>(180)    | –                                                                            | Steam<br>(1500 kPa, 6 g min <sup>-1</sup> )                   | 613          | 3           | n.r.         | 90                      | n.r.                          | S17          |
| 2     | Nylon 6 (0.1)              | –                                                                            | H <sub>2</sub> O (3.7 mL)                                     | 573          | 1           | n.r.         | 85                      | 3.3                           | S18          |
| 3     | MC nylon<br>(1.0)          | –                                                                            | H <sub>2</sub> O (30 g)                                       | 618          | 1.3         | 100          | 89                      | 0                             | S19          |
| 4     | Waste and<br>scrap nylon 6 | –                                                                            | H <sub>2</sub> O<br>(nylon 6/H <sub>2</sub> O = 1/11 (wt/wt)) | 573          | 1           | 100          | 92                      | n.r.                          | S20          |
| 5     | Nylon 6                    | H <sub>3</sub> PW <sub>12</sub> O <sub>40</sub> (3%)                         | H <sub>2</sub> O<br>(nylon 6/H <sub>2</sub> O = 1/15 (wt/wt)) | 603          | 1.2         | n.r.         | 78                      | n.r.                          | S21          |
| 6     | Nylon 6 (8.0)              | HCl (12 M, 200 mL)                                                           | H <sub>2</sub> O                                              | 382          | 24          | n.r.         | n.r.                    | 85 <sup>c</sup>               | S22          |
| 7     | MC nylon<br>(1.0)          | H-Beta <sup>b</sup> (0.3)                                                    | H <sub>2</sub> O (39 g)                                       | 618          | 1.2         | 100          | 82                      | n.r.                          | S23,<br>S24  |
| 8     | MC nylon<br>(1.0)          | Sulfated $\gamma$ -Al <sub>2</sub> O <sub>3</sub> -ZrO <sub>2</sub><br>(0.3) | H <sub>2</sub> O (39 g)                                       | 618          | 1.2         | n.r.         | 80                      | n.r.                          | S23          |
| 9     | Nylon 6<br>(0.23)          | m-ZrO <sub>2</sub> (0.10)                                                    | H <sub>2</sub> O (10 g)                                       | 453          | 16          | n.d.         | 55                      | 33                            | This<br>work |
| 10    | Nylon 6<br>(0.23)          | m-ZrO <sub>2</sub> (0.10)                                                    | H <sub>2</sub> O (10 g)                                       | 503          | 2           | n.d.         | 81                      | 13                            | This<br>work |
| 11    | Nylon 6<br>(0.23)          | –                                                                            | H <sub>2</sub> O (10 g)                                       | 503          | 2           | n.d.         | 6.5                     | 0.0                           | This<br>work |

<sup>a</sup>Abbreviations: MC = monomer casting; m-ZrO<sub>2</sub> = monoclinic-rich ZrO<sub>2</sub>; n.d. = not determined; n.r. = not reported. <sup>b</sup>Si/Al ratio = 12. <sup>c</sup>Isolated yield of  $\epsilon$ -aminocaproic acid hydrochloride.

**Table S4.** List of chemicals used in this study.

| Chemical (abbreviation)          | Supplier                     | Purity, concentration, or detailed information |
|----------------------------------|------------------------------|------------------------------------------------|
| Glycylglycine (Gly-Gly)          | Tokyo Chemical Industry      | >99.0%                                         |
| Glycine (Gly)                    | Tokyo Chemical Industry      | >99.0%                                         |
| Glycine anhydride                | Tokyo Chemical Industry      | >98.0%                                         |
| CaCO <sub>3</sub>                | FUJIFILM Wako Pure Chemical  | >99.5%                                         |
| Zr(OH) <sub>4</sub>              | Daiichi Kigenso Kagaku Kogyo |                                                |
| Glycyl-L-leucine (Gly-Leu)       | Peptide Institute            | >99.0%                                         |
| L-Leucine (Leu)                  | Tokyo Chemical Industry      | >99.0%                                         |
| Glycyl-L-aspartic acid (Gly-Asp) | Sigma-Aldrich                | >99.0%                                         |
| L-Aspartic acid (Asp)            | Tokyo Chemical Industry      | >99.0%                                         |
| L-Histidyl-L-leucine (His-Leu)   | Peptide Institute            | >99.0%                                         |
| L-Histidine (His)                | Tokyo Chemical Industry      | >99.0%                                         |
| <i>N</i> -Ethylpropionamide      | Tokyo Chemical Industry      | >99.0%                                         |
| Propionic acid                   | Tokyo Chemical Industry      | >99.0%                                         |
| Ethylamine                       | Tokyo Chemical Industry      | 70 wt%                                         |
| <i>N,N</i> -Diethylpropionamide  | Tokyo Chemical Industry      | >98.0%                                         |
| Diethylamine                     | Tokyo Chemical Industry      | >99.0%                                         |
| Nylon 6                          | Sigma-Aldrich                | Pellets<br>(diameter = 2.2 mm)                 |
| $\epsilon$ -Aminocaproic acid    | Tokyo Chemical Industry      | >98.0%                                         |
| $\epsilon$ -Caprolactam          | Tokyo Chemical Industry      | >99.0%                                         |
| D-Sorbitol                       | FUJIFILM Wako Pure Chemical  | >98.0%                                         |
| <i>tert</i> -Butyl alcohol       | Tokyo Chemical Industry      | >99.0%                                         |
| Glycerol                         | FUJIFILM Wako Pure Chemical  | >99.5%                                         |
| NaH <sub>2</sub> PO <sub>4</sub> | FUJIFILM Wako Pure Chemical  | >98.0%                                         |
| Na <sub>2</sub> HPO <sub>4</sub> | FUJIFILM Wako Pure Chemical  | >99.0%                                         |
| Acetonitrile                     | Kanto Chemical               | >99.9%, HPLC grade                             |

**Table S5.** List of metal oxides and chemicals tested as catalysts in this study.

| Catalyst<br>(abbreviation)                             | Supplier                     | Product name<br>or detailed information                    | Heat-treatment conditions<br>prior to each use    |              |             |
|--------------------------------------------------------|------------------------------|------------------------------------------------------------|---------------------------------------------------|--------------|-------------|
|                                                        |                              |                                                            | Atmosphere                                        | Temp.<br>[K] | Time<br>[h] |
| Monoclinic-rich ZrO <sub>2</sub> (m-ZrO <sub>2</sub> ) | Daiichi Kigenso Kagaku Kogyo | RC-100 grade                                               | Air                                               | 673–873      | 3           |
| Tetragonal-rich ZrO <sub>2</sub> (t-ZrO <sub>2</sub> ) | Prepared by ourselves        | Calcination of Zr(OH) <sub>4</sub> at 673 K for 3 h in air | –                                                 | –            | –           |
| CeO <sub>2</sub>                                       | Daiichi Kigenso Kagaku Kogyo | HS grade                                                   | Air                                               | 873          | 3           |
| MgO                                                    | Ube Material Industries      | 500A                                                       | N <sub>2</sub> flow<br>(30 mL min <sup>-1</sup> ) | 773          | 3           |
| CaO                                                    | Prepared by ourselves        | Calcination of CaCO <sub>3</sub> at 1173 K for 3 h in air  | N <sub>2</sub> flow<br>(30 mL min <sup>-1</sup> ) | 773          | 3           |
| Y <sub>2</sub> O <sub>3</sub>                          | Kanto Chemical               |                                                            | Air                                               | 773          | 3           |
| La <sub>2</sub> O <sub>3</sub>                         | Kanto Chemical               |                                                            | Air                                               | 773          | 3           |
| Pr <sub>6</sub> O <sub>11</sub>                        | Kanto Chemical               |                                                            | Air                                               | 773          | 3           |
| Sm <sub>2</sub> O <sub>3</sub>                         | Kanto Chemical               |                                                            | Air                                               | 773          | 3           |
| Yb <sub>2</sub> O <sub>3</sub>                         | Kanto Chemical               |                                                            | Air                                               | 773          | 3           |
| TiO <sub>2</sub>                                       | FUJIFILM Wako Pure Chemical  | Anatase type                                               | Air                                               | 773          | 3           |
| Nb <sub>2</sub> O <sub>5</sub>                         | Catalysis Society of Japan   | JRC-NBO-1                                                  | Air                                               | 773          | 3           |
| MoO <sub>3</sub>                                       | FUJIFILM Wako Pure Chemical  |                                                            | Air                                               | 773          | 3           |
| MnO <sub>2</sub>                                       | FUJIFILM Wako Pure Chemical  |                                                            | Air                                               | 773          | 3           |
| Fe <sub>2</sub> O <sub>3</sub>                         | FUJIFILM Wako Pure Chemical  |                                                            | Air                                               | 773          | 3           |
| ZnO                                                    | Kanto Chemical               |                                                            | Air                                               | 773          | 3           |
| α-Al <sub>2</sub> O <sub>3</sub>                       | FUJIFILM Wako Pure Chemical  |                                                            | Air                                               | 773          | 3           |
| SiO <sub>2</sub>                                       | Fuji Silysia Chemical        | G-6 grade                                                  | Air                                               | 773          | 3           |
| SnO <sub>2</sub>                                       | Kanto Chemical               |                                                            | Air                                               | 773          | 3           |



|                                                  |                             |                                                                                       |     |     |   |
|--------------------------------------------------|-----------------------------|---------------------------------------------------------------------------------------|-----|-----|---|
| SiO <sub>2</sub> -Al <sub>2</sub> O <sub>3</sub> | Catalysis Society of Japan  | JRC-SAH-1, Si/Al = 2                                                                  | Air | 773 | 3 |
| Beta-type zeolite (Beta)                         | Tosoh                       | HSZ-930HOA, Si/Al = 13.5, H-type                                                      | Air | 773 | 3 |
| FAU-type zeolite (FAU)                           | Zeolyst                     | CBV720, Si/Al = 15, H-type                                                            | Air | 773 | 3 |
| Hydrotalcite                                     | FUJIFILM Wako Pure Chemical | Mg <sub>6</sub> Al <sub>2</sub> (OH) <sub>16</sub> CO <sub>3</sub> ·4H <sub>2</sub> O | –   | –   | – |
| H <sub>2</sub> SO <sub>4</sub>                   | FUJIFILM Wako Pure Chemical | 96–98%                                                                                | –   | –   | – |
| NaOH                                             | FUJIFILM Wako Pure Chemical | >97%                                                                                  | –   | –   | – |

---

**Table S6.** Detailed data of Fig. S2 (hydrolysis of Gly-Gly in the presence of different amount of CaO).<sup>a</sup>

| Entry          | Time [h] | Amount of CaO |        | Conv. [%] | Yield [%-C] |                   | Bal. <sup>c</sup> [%] |
|----------------|----------|---------------|--------|-----------|-------------|-------------------|-----------------------|
|                |          | [g]           | [mmol] |           | Glycine     | Glycine anhydride |                       |
| 1 <sup>b</sup> | 4        | 0             | 0      | 0         | 0           | 101               |                       |
| 2              |          | 0.025         | 0.45   | 1.0       | 0.6         | 1.0               |                       |
| 3              |          | 0.050         | 0.89   | 3.8       | 0.8         | 1.3               |                       |
| 4              |          | 0.075         | 1.3    | 23        | 24          | 0                 |                       |
| 5              |          | 0.10          | 1.8    | 38        | 38          | 0                 |                       |
| 6              |          | 0.13          | 2.2    | 39        | 40          | 0                 |                       |
| 7 <sup>b</sup> | 8        | 0             | 0      | 0         | 0           | 100               |                       |
| 8              |          | 0.025         | 0.45   | 4.4       | 0.3         | 2.1               |                       |
| 9              |          | 0.050         | 0.89   | 4.8       | 1.5         | 2.4               |                       |
| 10             |          | 0.075         | 1.3    | 31        | 30          | 0                 |                       |
| 11             |          | 0.10          | 1.8    | 63        | 63          | 0                 |                       |
| 12             |          | 0.13          | 2.2    | 65        | 67          | 0                 |                       |

<sup>a</sup>Reaction conditions: Gly-Gly 2.0 mmol; CaO 0–0.13 g; H<sub>2</sub>O 5.0 g; 353 K; 4 or 8 h; Ar.

<sup>b</sup>Operated without catalyst in air. <sup>c</sup>Balance.

The hydrolysis of Gly-Gly was operated in the presence of different amount of CaO for 4 h or 8 h (Table S6). Neither 0.025 g nor 0.050 g of CaO was not effective for the hydrolysis of Gly-Gly regardless of the reaction times (entries 2, 3, 8, and 9). These results could result from the neutralization of strongly basic Ca species by acidic functional group (*i.e.*, carboxyl group) of Gly-Gly. The larger amount of CaO ( $\geq 0.075$  g) proceeded with the hydrolysis of Gly-Gly (entries 4–6 and 10–12), yet 0.10 g and 0.13 g of CaO offered almost the same reaction results (entry 5 *vs.* entry 6 and entry 11 *vs.* entry 12). This unprecedented trend upon the amount of CaO might be again connected to the neutralization of strongly basic species by carboxylic acids involved in both unreacted Gly-Gly and produced glycine (the progress of Gly-Gly hydrolysis increases the number of carboxyl group in a reaction mixture since two glycine molecules are generated from one Gly-Gly molecule). Altogether, CaO was not as an effective catalyst as m-ZrO<sub>2</sub> in the hydrolysis of Gly-Gly.

**Table S7.** Detailed data of Fig. 2 (time courses of Gly-Gly hydrolysis over m-ZrO<sub>2</sub> catalyst at different temperatures).<sup>a</sup>

| Enrty | Temp.<br>[K] | Time<br>[h] | Conv.<br>[%] | Yield [%-C] |                   | Bal. <sup>b</sup><br>[%] |
|-------|--------------|-------------|--------------|-------------|-------------------|--------------------------|
|       |              |             |              | Glycine     | Glycine anhydride |                          |
| 1     | 333          | 8           | 15           | 13          | 1.6               | 100                      |
| 2     |              | 24          | 37           | 31          | 2.1               | 97                       |
| 3     |              | 48          | 57           | 52          | 3.5               | 99                       |
| 4     |              | 72          | 69           | 64          | 4.2               | 99                       |
| 5     |              | 96          | 78           | 72          | 4.8               | 99                       |
| 6     |              | 120         | 85           | 78          | 4.3               | 97                       |
| 7     | 353          | 2           | 20           | 21          | 1.9               | 103                      |
| 8     |              | 4           | 43           | 40          | 2.8               | 101                      |
| 9     |              | 8           | 65           | 57          | 4.9               | 98                       |
| 10    |              | 24          | 91           | 83          | 5.7               | 99                       |
| 11    |              | 48          | 98           | 91          | 4.4               | 98                       |
| 12    |              | 72          | 100          | 95          | 3.2               | 98                       |
| 13    |              | 96          | 100          | 96          | 2.4               | 99                       |
| 14    |              | 120         | 100          | 95          | 1.9               | 97                       |
| 15    | 373          | 0.5         | 26           | 25          | 2.3               | 102                      |
| 16    |              | 1           | 53           | 47          | 4.9               | 99                       |
| 17    |              | 1.5         | 68           | 59          | 6.0               | 97                       |
| 18    |              | 2           | 82           | 74          | 6.9               | 98                       |
| 19    |              | 4           | 98           | 89          | 6.6               | 98                       |
| 20    |              | 8           | 99           | 94          | 4.8               | 100                      |
| 21    |              | 24          | 100          | 97          | 1.6               | 99                       |

<sup>a</sup>Reaction conditions: Gly-Gly 2.0 mmol; m-ZrO<sub>2</sub> (calcined at 673 K) 0.10 g; H<sub>2</sub>O 5.0 g; 333–373 K; 0.5–120 h. <sup>b</sup>Balance.

**Table S8.** Surface acidity and basicity of fresh and spent m-ZrO<sub>2</sub> catalysts.

| Entry | m-ZrO <sub>2</sub>                       | $S_{\text{BET}}^a$<br>[m <sup>2</sup> g <sup>-1</sup> ] | Desorbed amount of NH <sub>3</sub> <sup>b</sup> [μmol g <sup>-1</sup> ] |            |       | Desorbed amount of CO <sub>2</sub> <sup>b</sup> [μmol g <sup>-1</sup> ] |            |       | Conv. <sup>c</sup><br>[%] | Yield <sup>e</sup> [%-C] |                   | Bal. <sup>c,d</sup><br>[%] |
|-------|------------------------------------------|---------------------------------------------------------|-------------------------------------------------------------------------|------------|-------|-------------------------------------------------------------------------|------------|-------|---------------------------|--------------------------|-------------------|----------------------------|
|       |                                          |                                                         | 383–773 K                                                               | 773–1173 K | Total | 383–773 K                                                               | 773–1173 K | Total |                           | Glycine                  | Glycine anhydride |                            |
| 1     | Fresh (1st run)                          | 85                                                      | 275                                                                     | 34         | 309   | 190                                                                     | 14         | 204   | 43                        | 40                       | 2.8               | 101                        |
| 2     | After 2nd run                            | 84                                                      | n.d.                                                                    | n.d.       | n.d.  | n.d.                                                                    | n.d.       | n.d.  | 39                        | 35                       | 3.5               | 99                         |
| 3     | After 3rd run                            | 82                                                      | n.d.                                                                    | n.d.       | n.d.  | n.d.                                                                    | n.d.       | n.d.  | 33                        | 26                       | 3.7               | 97                         |
| 4     | After 3rd run + calcination <sup>e</sup> | 84                                                      | 276                                                                     | 46         | 322   | 145                                                                     | 46         | 191   | 26                        | 23                       | 3.3               | 101                        |

<sup>a</sup>BET specific surface area. <sup>b</sup>Total desorbed amount of each probe molecule in each TPD profile (Fig. S8). <sup>c</sup>Results of Gly-Gly hydrolysis (the data for entry 1 are the same as those of m-ZrO<sub>2</sub> in Tables 1 and 2). Reaction conditions: Gly-Gly 2.0 mmol; m-ZrO<sub>2</sub> (calcined at 673 K) 0.10 g; H<sub>2</sub>O 5.0 g; 353 K; 4 h.

<sup>d</sup>Balance. <sup>e</sup>Calcination conditions: air; 673 K; 3 h.

**Table S9.** Detailed data of Fig. S9A (time course for the hydrolysis of glycyl-L-leucine (Gly-Leu) over m-ZrO<sub>2</sub> catalyst).<sup>a</sup>

| Entry | Time [h] | Conv. [%] | Yield [%] |           |
|-------|----------|-----------|-----------|-----------|
|       |          |           | Glycine   | L-Leucine |
| 1     | 0.25     | 4         | 3.5       | 3.9       |
| 2     | 0.5      | 9         | 11        | 11        |
| 3     | 1        | 25        | 24        | 26        |
| 4     | 2        | 61        | 58        | 57        |
| 5     | 4        | 75        | 75        | 77        |
| 6     | 8        | 96        | 88        | 91        |
| 7     | 24       | 100       | 95        | 95        |

<sup>a</sup>Reaction conditions: glycyl-L-leucine 0.50 mmol; m-ZrO<sub>2</sub> (calcined at 673 K) 0.025 g; H<sub>2</sub>O 5.0 g; 373 K; 0.25–24 h.

**Table S10.** Detailed data of Fig. S9B (time course for the hydrolysis of glycyl-L-aspartic acid (Gly-Asp) over m-ZrO<sub>2</sub> catalyst).<sup>a</sup>

| Entry | Time [h] | Conv. [%] | Yield [%] |                 |
|-------|----------|-----------|-----------|-----------------|
|       |          |           | Glycine   | L-Aspartic acid |
| 1     | 1        | 11        | 2.9       | 3.0             |
| 2     | 2        | 24        | 6.9       | 7.3             |
| 3     | 4        | 38        | 15        | 13              |
| 4     | 8        | 74        | 31        | 31              |
| 5     | 24       | 100       | 53        | 53              |
| 6     | 48       | 100       | 75        | 73              |
| 7     | 72       | 100       | 82        | 84              |

<sup>a</sup>Reaction conditions: glycyl-L-aspartic acid 0.50 mmol; m-ZrO<sub>2</sub> (calcined at 673 K) 0.025 g; H<sub>2</sub>O 5.0 g; 373 K; 1–72 h.

**Table S11.** Detailed data of Fig. S9C (time course for the hydrolysis of L-histidyl-L-leucine (His-Leu) over m-ZrO<sub>2</sub> catalyst).<sup>a</sup>

| Entry | Time [h] | Conv. [%] | Yield [%]   |           |
|-------|----------|-----------|-------------|-----------|
|       |          |           | L-Histidine | L-Leucine |
| 1     | 0.25     | 15        | 4.9         | 5.3       |
| 2     | 0.5      | 25        | 8.3         | 8.5       |
| 3     | 1        | 39        | 18          | 20        |
| 4     | 4        | 80        | 53          | 58        |
| 5     | 8        | 94        | 65          | 69        |
| 6     | 24       | 100       | 73          | 76        |
| 7     | 48       | 100       | 70          | 73        |

<sup>a</sup>Reaction conditions: L-histidyl-L-leucine 0.50 mmol; m-ZrO<sub>2</sub> (calcined at 673 K) 0.025 g; H<sub>2</sub>O 5.0 g; 373 K; 0.25–48 h.

**Table S12.** The data of Gly-Gly hydrolysis over m-ZrO<sub>2</sub> catalyst under the same conditions as substrate scope of dipeptides.<sup>a</sup>

| Entry | Time [h] | Conv. [%] | Yield [%-C] |                   | Bal. <sup>b</sup> [%] |
|-------|----------|-----------|-------------|-------------------|-----------------------|
|       |          |           | Glycine     | Glycine anhydride |                       |
| 1     | 0.25     | 15        | 16          | 2.2               | 103                   |
| 2     | 0.33     | 30        | 28          | 3.3               | 102                   |
| 3     | 0.5      | 39        | 38          | 4.2               | 103                   |

<sup>a</sup>Reaction conditions: Gly-Gly 0.50 mmol; m-ZrO<sub>2</sub> (calcined at 673 K) 0.025 g; H<sub>2</sub>O 5.0 g; 373 K; 0.25–0.5 h. <sup>b</sup>Balance.

**Table S13.** Detailed data of Fig. S10 (time course of *N*-ethylpropionamide hydrolysis over m-ZrO<sub>2</sub> catalyst).<sup>a</sup>

| Entry | Time [h] | Conv. [%] | Yield [%]      |            | Balance of each moiety [%] |       |
|-------|----------|-----------|----------------|------------|----------------------------|-------|
|       |          |           | Propionic acid | Ethylamine | Carboxylic acid            | Amine |
| 1     | 0        | 6         | 2.6            | 2.6        | 97                         | 97    |
| 2     | 8        | 35        | 31             | 32         | 96                         | 97    |
| 3     | 24       | 54        | 49             | 49         | 94                         | 94    |
| 4     | 48       | 67        | 65             | 65         | 98                         | 97    |
| 5     | 72       | 76        | 74             | 75         | 98                         | 99    |
| 6     | 96       | 74        | 71             | 71         | 96                         | 96    |
| 7     | 120      | 79        | 78             | 76         | 99                         | 97    |

<sup>a</sup>Reaction conditions: *N*-ethylpropionamide 2.0 mmol; m-ZrO<sub>2</sub> (calcined at 673 K) 0.10 g; H<sub>2</sub>O 10 g; 463 K; 0–120 h.

**Table S14.** Detailed data of Fig. S11 (time course of *N,N*-diethylpropionamide hydrolysis over m-ZrO<sub>2</sub> catalyst).<sup>a</sup>

| Entry | Time [h] | Conv. [%] | Yield [%]      |              | Balance of each moiety [%] |       |
|-------|----------|-----------|----------------|--------------|----------------------------|-------|
|       |          |           | Propionic acid | Diethylamine | Carboxylic acid            | Amine |
| 1     | 24       | 11        | 8.0            | 8.6          | 97                         | 97    |
| 2     | 48       | 20        | 15             | 17           | 95                         | 97    |
| 3     | 120      | 41        | 35             | 37           | 94                         | 96    |
| 4     | 144      | 47        | 41             | 43           | 94                         | 96    |
| 5     | 168      | 52        | 48             | 50           | 96                         | 98    |

<sup>a</sup>Reaction conditions: *N,N*-diethylpropionamide 2.0 mmol; m-ZrO<sub>2</sub> (calcined at 673 K) 0.10 g; H<sub>2</sub>O 10 g; 463 K; 0–168 h.

**Table S15.** Comparison of catalytic activity between m-ZrO<sub>2</sub> and Nb<sub>2</sub>O<sub>5</sub> in the hydrolysis of *N*-ethylpropionamide.<sup>a</sup>

| Entry | Catalyst                       | Conv. [%] | Yield [%]      |            | Balance of each moiety [%] |       |
|-------|--------------------------------|-----------|----------------|------------|----------------------------|-------|
|       |                                |           | Propionic acid | Ethylamine | Carboxylic acid            | Amine |
| 1     | None                           | 6.3       | 3.4            | 3.5        | 97                         | 97    |
| 2     | m-ZrO <sub>2</sub>             | 35        | 31             | 32         | 96                         | 97    |
| 3     | Nb <sub>2</sub> O <sub>5</sub> | 9.2       | 6.2            | 5.7        | 97                         | 96    |

<sup>a</sup>Reaction conditions: *N*-ethylpropionamide 2.0 mmol; m-ZrO<sub>2</sub> (calcined at 673 K) or Nb<sub>2</sub>O<sub>5</sub> 0.10 g; H<sub>2</sub>O 10 g; 463 K; 8 h.

**Table S16.** Detailed data of Fig. S12 (time courses of nylon 6 hydrolysis over m-ZrO<sub>2</sub> catalyst at different reaction temperatures).<sup>a</sup>

| Entry           | Temp. [K] | Time [h] | Yield [%]               |                               |           | Bal. <sup>b</sup> [%] |
|-----------------|-----------|----------|-------------------------|-------------------------------|-----------|-----------------------|
|                 |           |          | $\epsilon$ -Caprolactam | $\epsilon$ -Aminocaproic acid | Oligomers |                       |
| 1               | 453       | 0        | 3.2                     | 1.8                           | 2.9       | 7.8                   |
| 2               |           | 4        | 26                      | 22                            | 32        | 80                    |
| 3               |           | 8        | 43                      | 31                            | 20        | 95                    |
| 4               |           | 12       | 49                      | 32                            | 14        | 95                    |
| 5               |           | 16       | 55                      | 33                            | 8.9       | 97                    |
| 6               | 503       | 0        | 23                      | 6.8                           | 13        | 43                    |
| 7               |           | 0.5      | 63                      | 13                            | 15        | 91                    |
| 8               |           | 1        | 69                      | 14                            | 8.6       | 92                    |
| 9               |           | 2        | 81                      | 13                            | 2.2       | 96                    |
| 10 <sup>c</sup> | 503       | 2        | 6.5                     | 0.0                           | 4.6       | 11                    |

<sup>a</sup>Reaction conditions: nylon 6, 0.23 g (corresponding to 2.0 mmol of monomeric unit); m-ZrO<sub>2</sub> (calcined at 673 K) 0.10 g; H<sub>2</sub>O 10 g; 453 or 503 K; 0–16 h. <sup>b</sup>Balance. <sup>c</sup>No catalyst.

**Table S17.** Conversion of  $\epsilon$ -caprolactam in the presence of m-ZrO<sub>2</sub> catalyst at different temperatures.<sup>a</sup>

| Entry | Temp. [K] | Amount of m-ZrO <sub>2</sub> [g] | Time [h] | Yield [%]                                     |                               |           | Bal. <sup>b</sup> [%] |
|-------|-----------|----------------------------------|----------|-----------------------------------------------|-------------------------------|-----------|-----------------------|
|       |           |                                  |          | $\epsilon$ -Caprolactam (unreacted substrate) | $\epsilon$ -Aminocaproic acid | Oligomers |                       |
| 1     | 453       | 0.10                             | 16       | 53                                            | 36                            | 7.8       | 97                    |
| 2     |           | 0.10                             | 32       | 52                                            | 37                            | 8.6       | 97                    |
| 3     |           | 0.30                             | 16       | 53                                            | 37                            | 9.0       | 100                   |
| 4     | 503       | 0.10                             | 2        | 80                                            | 15                            | 4.2       | 100                   |
| 5     |           | 0.10                             | 4        | 76                                            | 21                            | 2.5       | 99                    |
| 6     |           | 0.30                             | 2        | 80                                            | 16                            | 2.3       | 98                    |

<sup>a</sup>Reaction conditions:  $\epsilon$ -caprolactam 2.0 mmol; m-ZrO<sub>2</sub> (calcined at 673 K) 0.10 or 0.30 g; H<sub>2</sub>O 10 g; 453 or 503 K; 2–32 h. <sup>b</sup>Balance.

The reaction data for the conversion of  $\epsilon$ -caprolactam in the presence of m-ZrO<sub>2</sub> catalyst (Table S17) allowed to estimate the equilibrium yields of  $\epsilon$ -caprolactam and  $\epsilon$ -aminocaproic acid at 453 K and 503 K. Due to the consistency among entries 1–3 as well as entries 4–6, the molar ratios of  $\epsilon$ -caprolactam to  $\epsilon$ -aminocaproic acid, ~1.5 and ~5.3, are the equilibrium compositions at 453 K and 503 K. In other words, the amount of  $\epsilon$ -caprolactam becomes higher at the higher reaction temperature of 503 K, which supports the reaction data summarized in Tables 4 and S16 and Fig. S12.



(A) NH2P-50 4E column

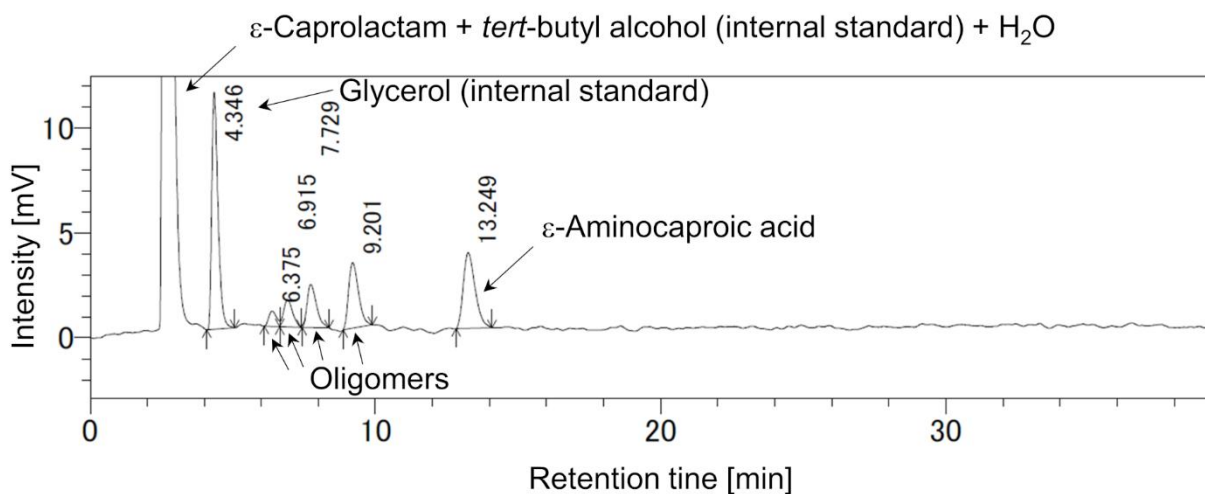

(B) Gemini NX-C18 column

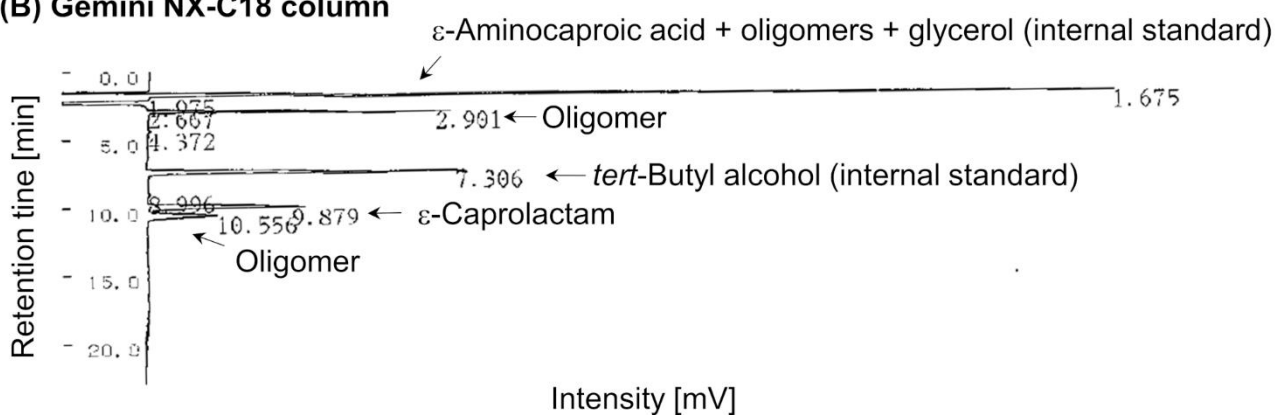

**Fig. S1.** Typical HPLC charts of the reaction mixture after the hydrolysis of nylon 6 over *m*-ZrO<sub>2</sub> catalyst operated at 453 K for 4 h (Table S16, entry 2): (A) NH2P-50 4E column; (B) Gemini NX-C18 column. Reaction conditions: nylon 6, 0.23 g (corresponding to 2.0 mmol of monomeric unit); *m*-ZrO<sub>2</sub> (calcined at 673 K) 0.10 g; H<sub>2</sub>O 10 g; 453 K; 4 h.

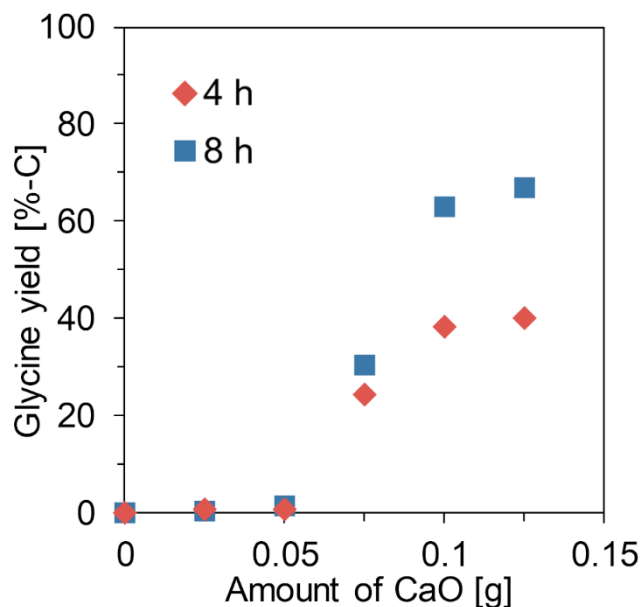

**Fig. S2.** Hydrolysis of Gly-Gly in the presence of different amount of CaO.

Reaction conditions: Gly-Gly 2.0 mmol; CaO 0–0.125 g; H<sub>2</sub>O 5.0 g; 353 K; 4 or 8 h; Ar (in the absence of catalyst, the reactions were operated in air).

The detailed data are shown in Table S6.

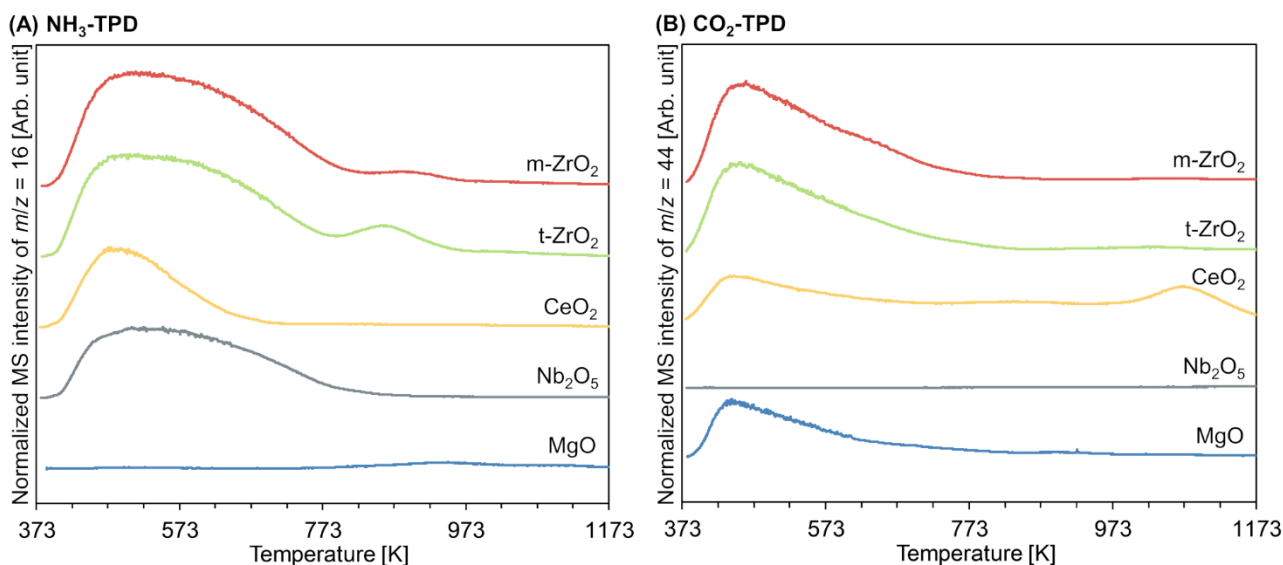

**Fig. S3.** (A) NH<sub>3</sub>-TPD and (B) CO<sub>2</sub>-TPD profiles for various metal oxides. The intensity was normalized by the sample amount and calibration factor. The quantification data are summarized in Table 2.

Pretreatment conditions: metal oxide 0.30 g; Ar 50 mL min<sup>-1</sup>; 673 K, 1 h. For MgO, prior to this standard pretreatment, the sample was heat-treated in an Ar flow (30 mL min<sup>-1</sup>) at 773 K for 3 h.

Adsorption conditions: (step 1) NH<sub>3</sub>/Ar (5.0 vol%) or CO<sub>2</sub>/Ar (10 vol%) 50 mL min<sup>-1</sup>, 373 K, 30 min; (step 2) Ar 50 mL min<sup>-1</sup>, 373 K, 30 min.

Desorption conditions: Ar 30 mL min<sup>-1</sup>; 10 K min<sup>-1</sup>; 373–1173 K.

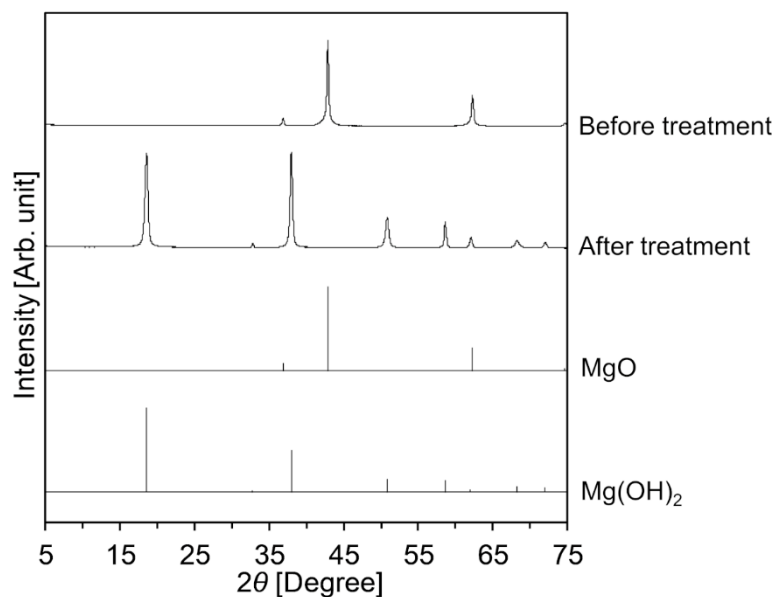

**Fig. S4.** XRD patterns of MgO before/after the hydrothermal treatment at 353 K. Treatment conditions: MgO 0.10 g; H<sub>2</sub>O 5.0 g; 353 K; 4 h; operated in Ar. References: cubic MgO = ICSD card #9863; trigonal Mg(OH)<sub>2</sub> = ICSD card #79031.

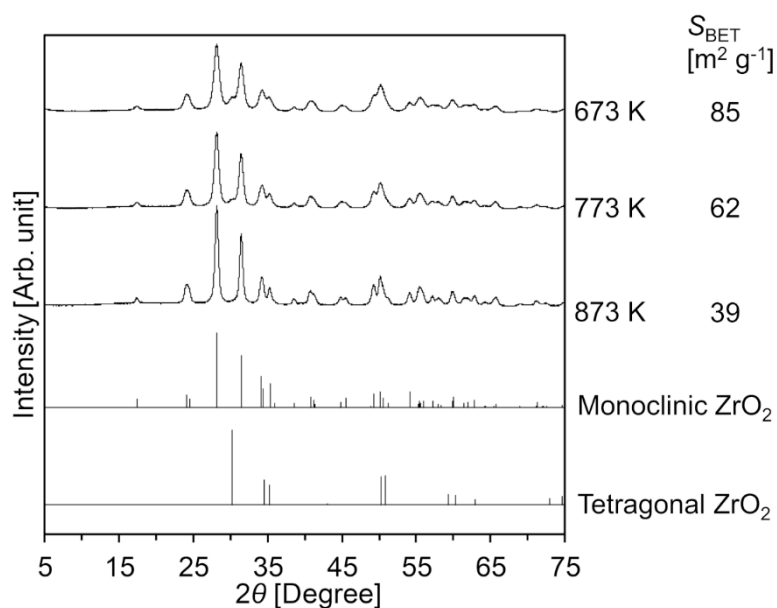

**Fig. S5.** XRD patterns of m-ZrO<sub>2</sub> samples calcined at different temperatures (673, 773, and 873 K). References: monoclinic ZrO<sub>2</sub> = ICSD card #18190; tetragonal ZrO<sub>2</sub> = ICSD card #68781.

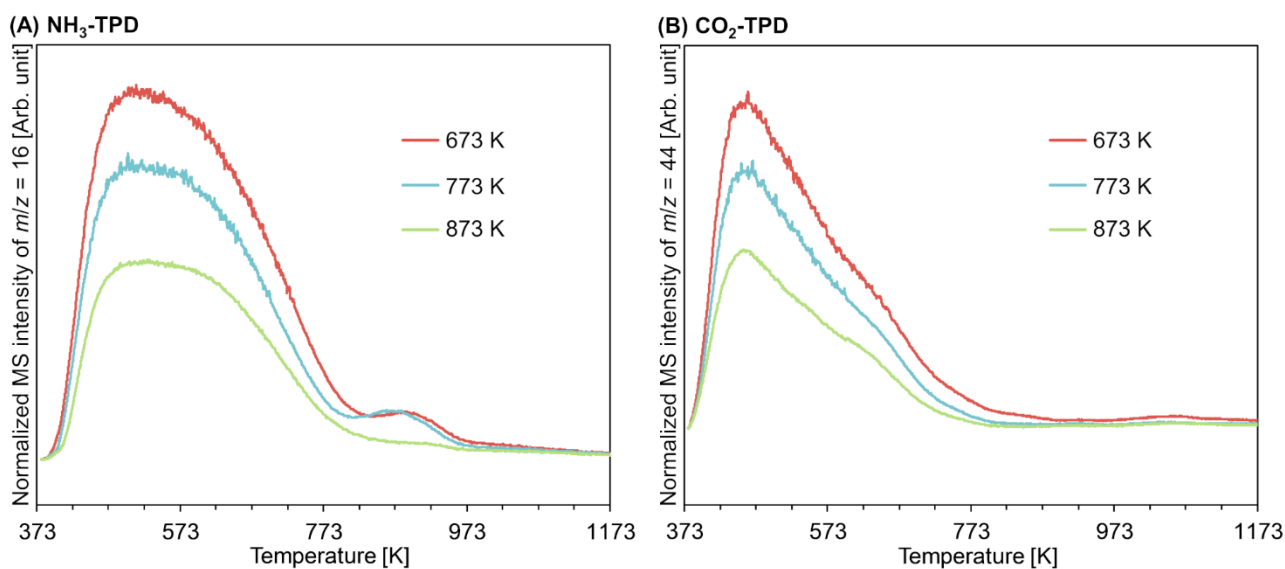

**Fig. S6.** (A)  $\text{NH}_3$ -TPD and (B)  $\text{CO}_2$ -TPD profiles for m- $\text{ZrO}_2$  samples calcined at different temperatures (673, 773, and 873 K). The intensity was normalized by the sample amount and calibration factor. The quantification data are summarized in Table 3.

Pretreatment conditions: m- $\text{ZrO}_2$  0.30 g; Ar 50 mL  $\text{min}^{-1}$ ; 673 K, 1 h.

Adsorption conditions: (step 1)  $\text{NH}_3/\text{Ar}$  (5.0 vol%) or  $\text{CO}_2/\text{Ar}$  (10 vol%) 50 mL  $\text{min}^{-1}$ , 373 K, 30 min; (step 2) Ar 50 mL  $\text{min}^{-1}$ , 373 K, 30 min.

Desorption conditions: Ar 30 mL  $\text{min}^{-1}$ ; 10 K  $\text{min}^{-1}$ ; 373–1173 K.

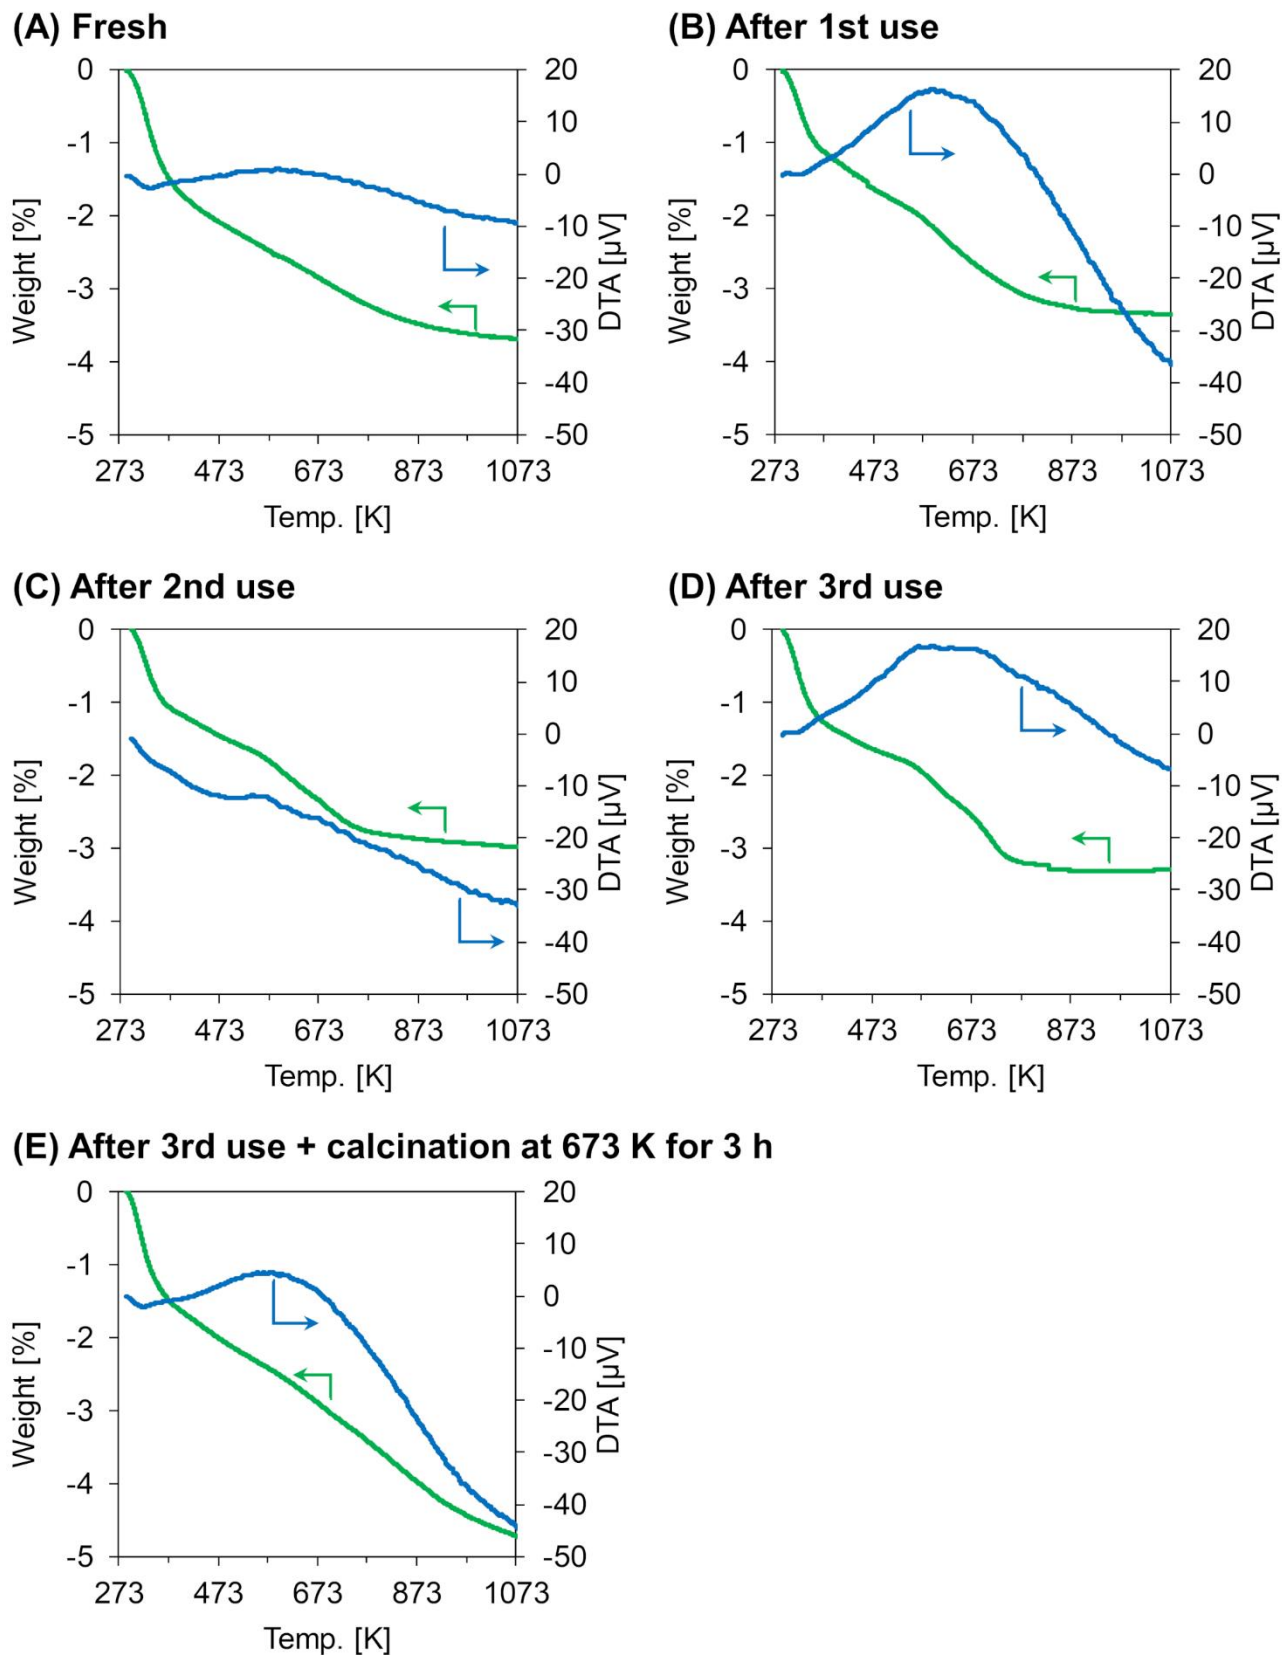

**Fig. S7.** TG-DTA profiles for fresh and spent m-ZrO<sub>2</sub> catalysts. (A) Fresh, (B) After 1st use, (C) After 2nd use, (D) After 3rd use, and (E) After 3rd use + calcination at 673 K for 3 h.

Reaction conditions: Gly-Gly 2.0 mmol; m-ZrO<sub>2</sub> (calcined at 673 K) 0.10 g; H<sub>2</sub>O 5.0 g; 353 K; 4 h.

The reaction data are shown in Fig. 3 and Table S8.

Analytical conditions: sample *ca.* 10 mg; air flow 30 mL min<sup>-1</sup>; ramp rate 10 K min<sup>-1</sup>.

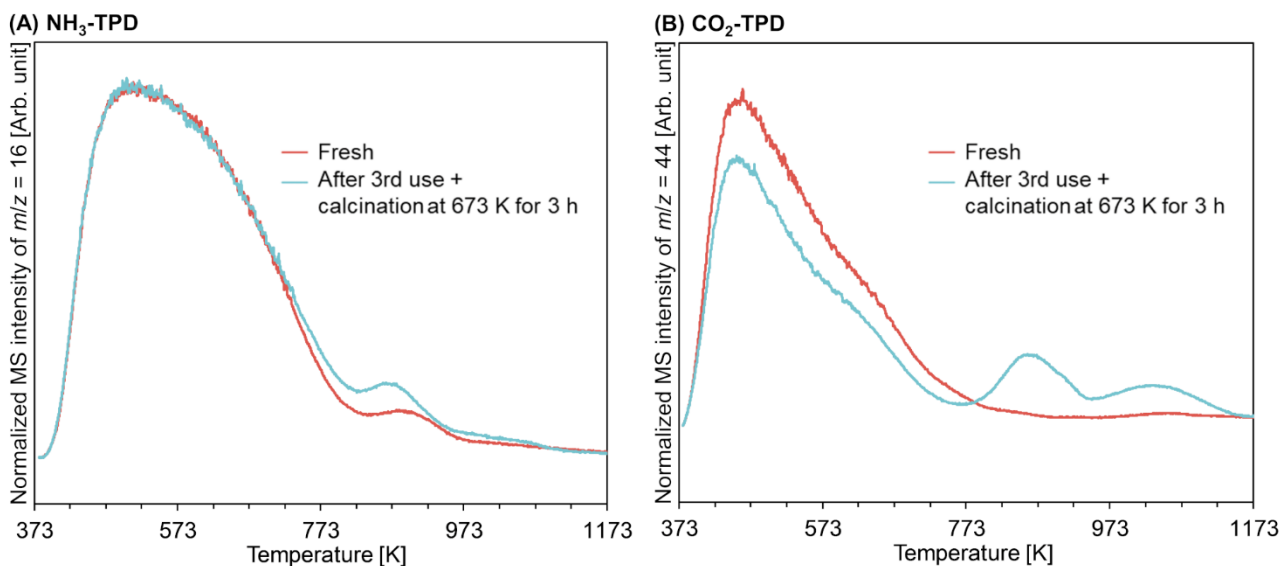

**Fig. S8.** (A)  $\text{NH}_3$ -TPD and (B)  $\text{CO}_2$ -TPD profiles for fresh and spent m- $\text{ZrO}_2$  catalysts. The intensity was normalized by the sample amount and calibration factor. The quantification data are summarized in Table S8. The fresh catalyst was prepared via the calcination at 673 K.

Pretreatment conditions: m- $\text{ZrO}_2$  0.30 g; Ar 50 mL  $\text{min}^{-1}$ ; 673 K, 1 h.

Adsorption conditions: (step 1)  $\text{NH}_3/\text{Ar}$  (5.0 vol%) or  $\text{CO}_2/\text{Ar}$  (10 vol%) 50 mL  $\text{min}^{-1}$ , 373 K, 30 min; (step 2) Ar 50 mL  $\text{min}^{-1}$ , 373 K, 30 min.

Desorption conditions: Ar 30 mL  $\text{min}^{-1}$ ; 10 K  $\text{min}^{-1}$ ; 373–1173 K.

**(A) Glycyl-L-leucine (Gly-Leu)**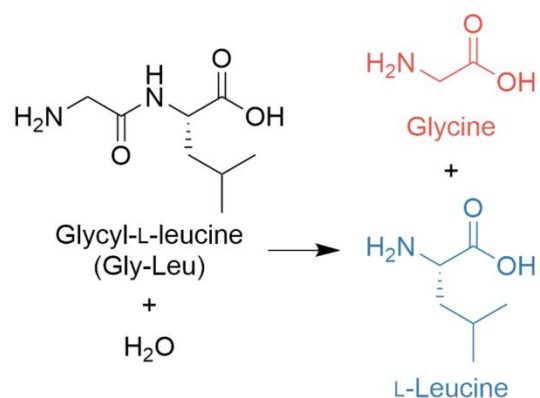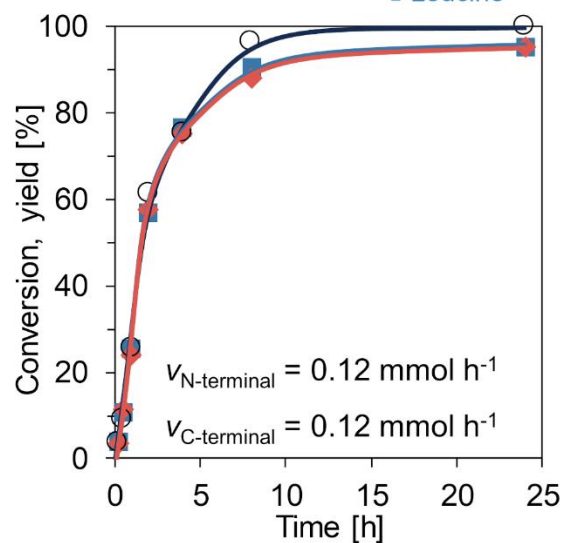**(B) Glycyl-L-aspartic acid (Gly-Asp)**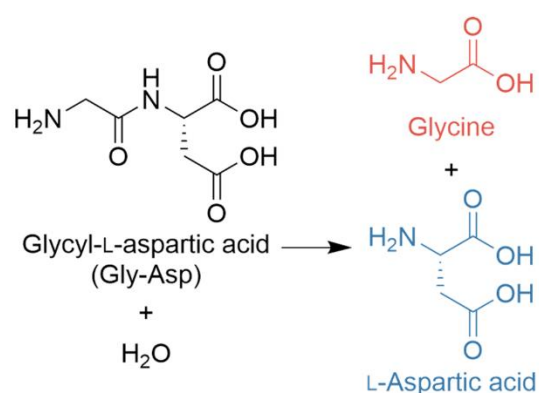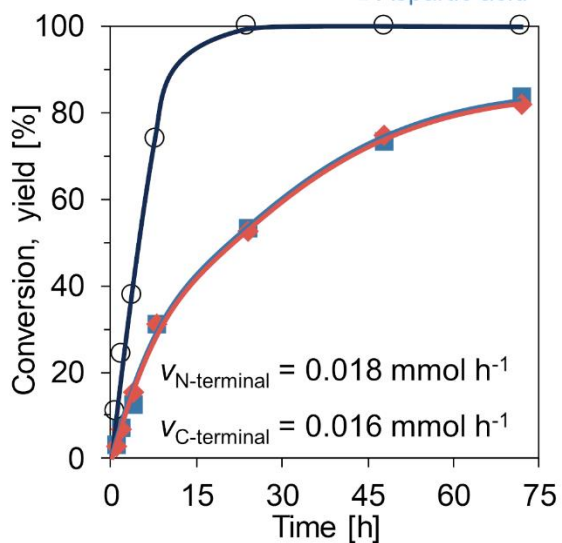**(C) L-Histidyl-L-leucine (His-Leu)**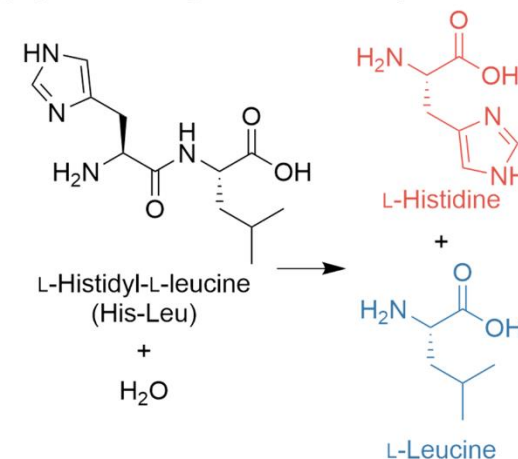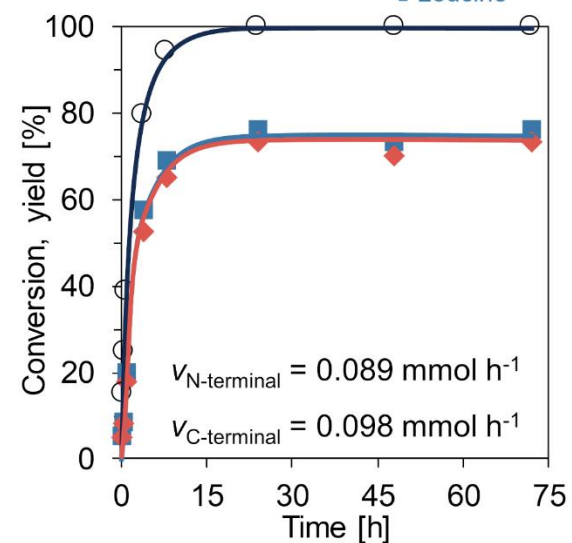

**Fig. S9.** Time courses for the hydrolysis of various dipeptides over m-ZrO<sub>2</sub> catalyst. Each formation rate of N-terminal/C-terminal amino acid ( $v$  [mmol h<sup>-1</sup>]) was calculated from the initial slope within the conversion range below 40%.

Legends: white circles = conversion of dipeptide; red diamonds = yield of N-terminal amino acid; blue squares = yield of C-terminal amino acid.

Reaction conditions: dipeptide 0.50 mmol; m-ZrO<sub>2</sub> (calcined at 673 K) 0.025 g; H<sub>2</sub>O 5.0 g; 373 K; 0.25–72 h.

The detailed data are shown in Tables S9–S11.

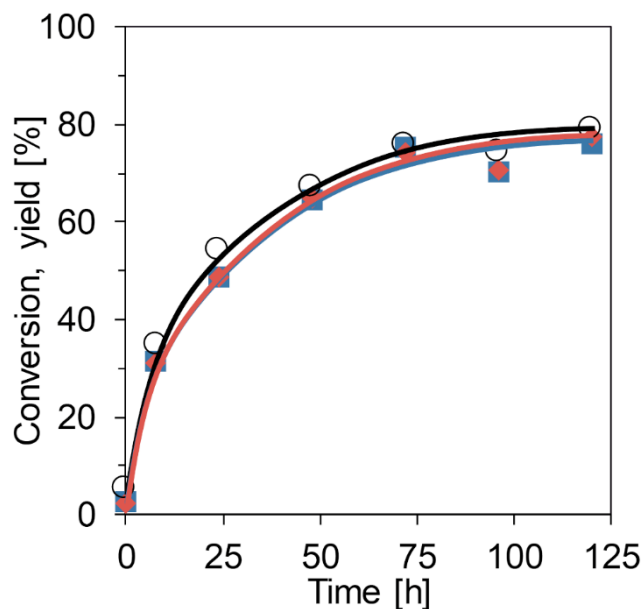

**Fig. S10.** Time course of *N*-ethylpropionamide hydrolysis over *m*-ZrO<sub>2</sub> catalyst.

Legends: white circles = conversion; red diamonds = yield of propionic acid; blue squares = yield of ethylamine.

Reaction conditions: *N*-ethylpropionamide 2.0 mmol; *m*-ZrO<sub>2</sub> (calcined at 673 K) 0.10 g; H<sub>2</sub>O 10 g; 463 K; 0–120 h.

The detailed data are shown in Table S13.

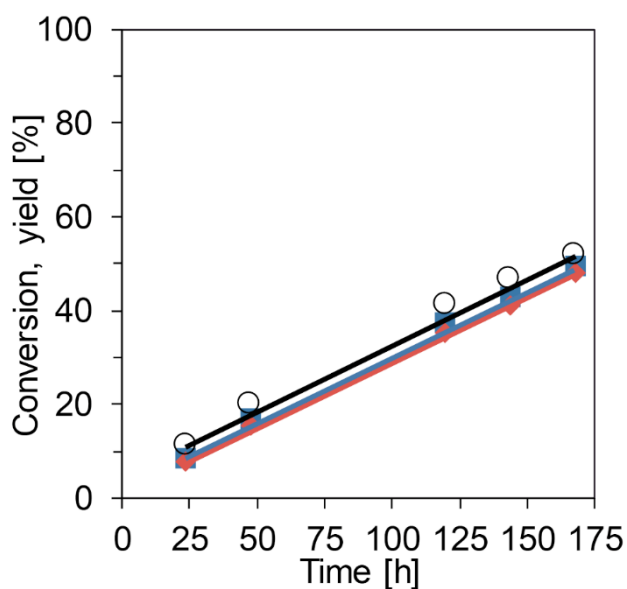

**Fig. S11.** Time course of *N,N*-diethylpropionamide hydrolysis over *m*-ZrO<sub>2</sub> catalyst.

Legends: white circles = conversion; red diamonds = yield of propionic acid; blue squares = yield of diethylamine.

Reaction conditions: *N,N*-diethylpropionamide 2.0 mmol; *m*-ZrO<sub>2</sub> (calcined at 673 K) 0.10 g; H<sub>2</sub>O 10 g; 463 K; 0–168 h.

The detailed data are shown in Table S14.



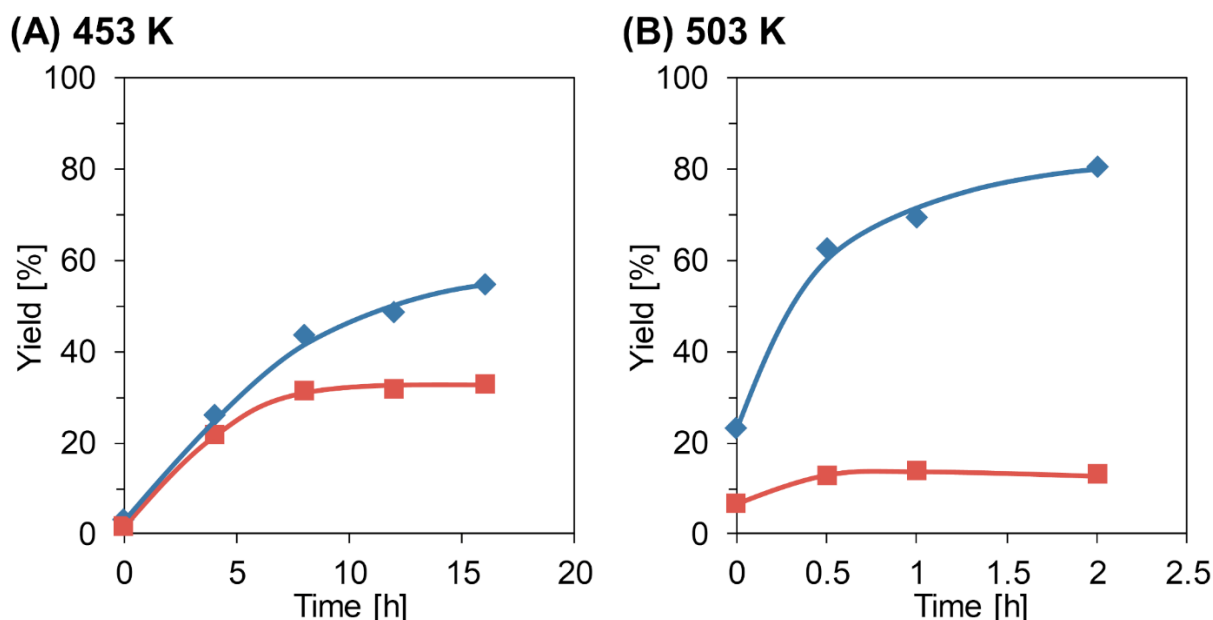

**Fig. S12.** Time courses of nylon 6 hydrolysis over m-ZrO<sub>2</sub> catalyst at different reaction temperatures: (A) 453 K; (B) 503 K.

Legends: blue diamonds = yield of  $\epsilon$ -caprolactam; red squares = yield of  $\epsilon$ -aminocaproic acid.

Reaction conditions: nylon 6, 0.23 g (corresponding to 2.0 mmol of monomeric unit); m-ZrO<sub>2</sub> (calcined at 673 K) 0.10 g; H<sub>2</sub>O 10 g; 453 or 503 K; 0–16 h.

The detailed data are shown in Table S16.

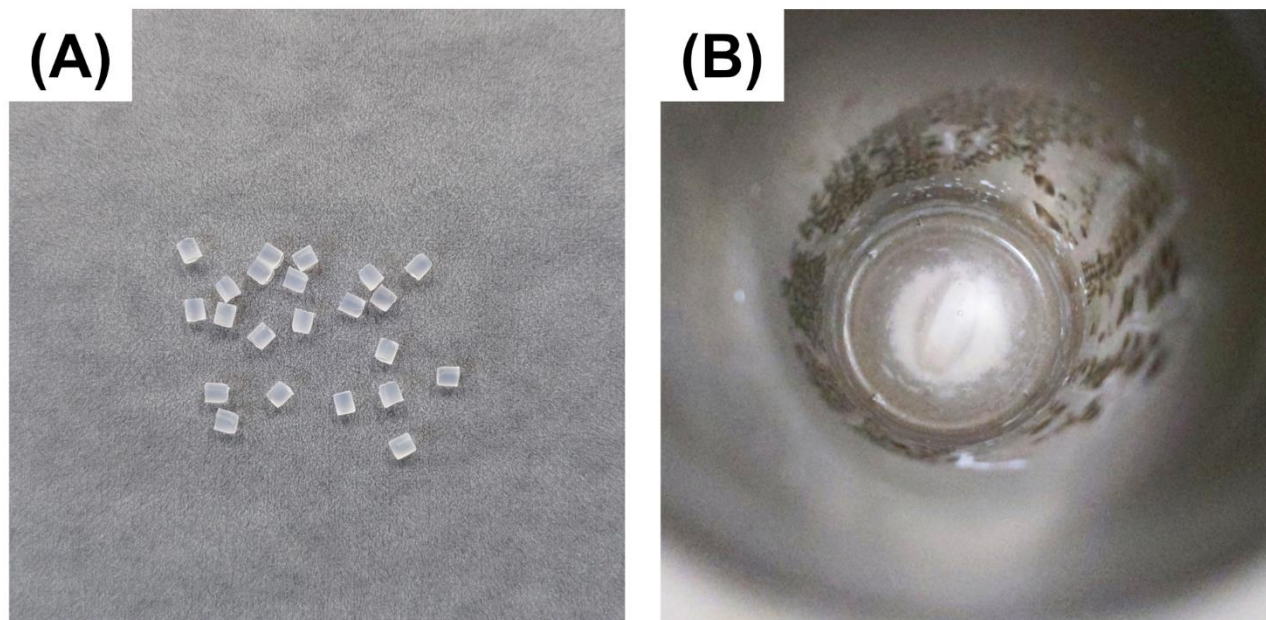

**Fig. S13.** Photos of (A) nylon 6 (as-received from the supplier) and (B) inside of the autoclave just after the reaction at 453 K for 0 h (*i.e.*, the reactor was cooled down soon after its inner temperature reached 453 K).

Reaction conditions for figure B: nylon 6, 0.23 g (corresponding to 2.0 mmol of monomeric unit); m-ZrO<sub>2</sub> (calcined at 673 K) 0.10 g; H<sub>2</sub>O 10 g; 453 K; 0 h.

## Supplementary references

- S1. J. Ni, Y. Sohma and M. Kanai, *Chem. Commun.*, 2017, **53**, 3311–3314.
- S2. G. Absillis and T. N. Parac-Vogt, *Inorg. Chem.*, 2012, **51**, 9902–9910.
- S3. T. Takarada, M. Yashiro and M. Komiya, *Chem. Eur. J.*, 2000, **6**, 3906–3913.
- S4. H. G. T. Ly, G. Fu, A. Kondinski, B. Bueken, D. De Vos and T. N. Parac-Vogt, *J. Am. Chem. Soc.*, 2018, **140**, 6325–6335.
- S5. S. Wang, H. G. T. Ly, M. Wahiduzzaman, C. Simms, I. Dovgaliuk, A. Tissot, G. Maurin, T. N. Parac-Vogt and C. Serre, *Nat. Commun.*, 2022, **13**, 1284.
- S6. A. Loosen, F. de Azambuja, S. Smolders, J. Moons, C. Simms, D. De Vos and T. N. Parac-Vogt, *Chem. Sci.*, 2020, **11**, 6662–6669.
- S7. H. G. T. Ly, G. Fu, F. de Azambuja, D. De Vos and T. N. Parac-Vogt, *ACS Appl. Nano Mater.*, 2020, **3**, 8931–8938.
- S8. A. Masuda and N. Dohmae, *Anal. Chem.*, 2010, **82**, 8939–8945.
- S9. S. M. A. H. Siddiki, M. N. Rashed, A. S. Touchy, M. A. R. Jamil, Y. Jing, T. Toyao, Z. Maeno and K. Shimizu, *Catal. Sci. Technol.*, 2021, **11**, 1949–1960.
- S10. S. M. A. H. Siddiki, A. S. Touchy, M. Tamura and K. Shimizu, *RSC Adv.*, 2014, **4**, 35803–35807.
- S11. T. Toyao, M. N. Rashed, Y. Morita, T. Kamachi, S. M. A. H. Siddiki, M. A. Ali, A. S. Touchy, K. Kon, Z. Maeno, K. Yoshizawa and K. Shimizu, *ChemCatChem*, 2019, **11**, 449–456.
- S12. M. N. Rashed, S. M. A. H. Siddiki, A. S. Touchy, M. A. R. Jamil, S. S. Poly, T. Toyao, Z. Maeno and K. Shimizu, *Chem. Eur. J.*, 2019, **25**, 10594–10605.
- S13. B. Villoria-del-Álamo, S. Rojas-Buzo, P. García-García and A. Corma, *Chem. Eur. J.*, 2021, **27**, 4588–4598.
- S14. Y. Kita, Y. Nishii, T. Higuchi and K. Mashima, *Angew. Chem. Int. Ed.*, 2012, **51**, 5723–5726.
- S15. H. Nagae, T. Hirai, D. Kato, S. Soma, S. Akebi and K. Mashima, *Chem. Sci.*, 2019, **10**, 2860–2868.
- S16. T. Hirai, D. Kato, B. K. Mai, S. Katayama, S. Akiyama, H. Nagae, F. Himo and K. Mashima, *Chem. Eur. J.*, 2020, **26**, 10735–10742.
- S17. M. Braun, A. B. Levy and S. Sifniades, *Polym.-Plast. Technol. Eng.*, 1999, **38**, 471–484.
- S18. T. Iwaya, M. Sasaki and M. Goto, *Polym. Degrad. Stab.*, 2006, **91**, 1989–1995.
- S19. W. Wang, L. Meng and Y. Huang, *Polym. Degrad. Stab.*, 2014, **110**, 312–317.
- S20. H. Hu, Q. Xu, L. Sun, R. Zhu, T. Gao, Y. He, B. Ma, J. Yu and X. Wang, *ACS Appl. Polym. Mater.*, 2023, **5**, 751–763.
- S21. J. Chen, Z. Li, L. Jin, P. Ni, G. Liu, H. He, J. Zhang, J. Dong and R. Ruan, *J. Mater. Cycles Waste Manag.*, 2010, **12**, 321–325.
- S22. X.-X. Yuan, Q. Zhou, X.-Y. Li, P. Yang, K.-K. Yang and Y.-Z. Wang, *Polym. Degrad. Stab.*, 2014, **109**, 171–174.
- S23. W. Wang, L. Meng, K. Leng and Y. Huang, *Polym. Degrad. Stab.*, 2017, **136**, 112–120.
- S24. W. Wang, L. Meng, J. Yu, F. Xie and Y. Huang, *J. Anal. Appl. Pyrolysis*, 2017, **125**, 218–226.
